# Supplementary material for: Association between Vaso-occlusive Crises and Opioid Prescriptions among Patients with Sickle Cell Disease: A Retrospective Claims-based Study
Source: PubMed Central journal article supplement (PMC7343345; doi:10.36469/jheor.2020.13348), 2020-06-26
Supplement: jheor-7-1-13348-s01.pdf [file jheor-7-1-13348-s01.pdf]

### Supplementary Online Material

Kang HA, Barner JC, Richards KM, Bhor M, Paulose J, Kutlar A. Association between vaso-occlusive crises and opioid prescriptions among patients with sickle cell disease: A retrospective claims-based study. *JHEOR*. 2020;7(1):95-101.

doi: [10.36469/jheor.2020.13348](https://doi.org/10.36469/jheor.2020.13348)

**Table S1.** ICD-9-CM and ICD-10 Codes for Complications of SCD

**Table S2.** ICD-9-CM and ICD-10 Codes for Comorbidities Associated with SCD

**Table S3.** Negative Binomial Regression Examining the Relationship Between Opioid Use and All-Cause and SCD-Related Hospitalizations (N = 3368)

**Table S4.** Negative Binomial Regression Examining the Relationship Between Opioid Use and All-Cause and SCD-Related ED Visits (N = 3368)

**Table S5.** Negative Binomial Regression Examining the Relationship Between Opioid Use and All-Cause and SCD-Related Outpatient Visits (N = 3368)

**Table S6.** Negative Binomial Regression Examining the Relationship Between Opioid Use and All-Cause and SCD-Related Prescriptions (n = 3368)

This supplementary material has been provided by the authors to give readers additional information about their work.

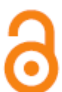

Table S1. ICD-9-CM and ICD-10 Codes for Complications of SCD

| Anatomy                                      | Disease/Disorder                                                                                    | ICD-9-CM                                                                                                      | ICD-10                                                                                                                                                                         |
|----------------------------------------------|-----------------------------------------------------------------------------------------------------|---------------------------------------------------------------------------------------------------------------|--------------------------------------------------------------------------------------------------------------------------------------------------------------------------------|
| Cardiovascular                               | CHF                                                                                                 | 428.0                                                                                                         | I50.2, I50.2x, I50.3, I50.3x, I50.4, I50.4x, I50.9                                                                                                                             |
|                                              | Cardiomegaly                                                                                        | 429.3                                                                                                         | I51.7                                                                                                                                                                          |
|                                              | Cardiomyopathy                                                                                      | 425.9                                                                                                         | I42, I42x (except I42.6; alcoholic cardiomyopathy, I42.7; cardiomyopathy due to drug and external agent)                                                                       |
|                                              | Diastolic dysfunction                                                                               | 429.9 (heart disease, unspecified)                                                                            | I51.9 (heart disease, unspecified)                                                                                                                                             |
|                                              | Dysrhythmia                                                                                         | 427.9                                                                                                         | I49.9                                                                                                                                                                          |
|                                              | Stroke, <sup>a</sup> specified as follows:                                                          |                                                                                                               |                                                                                                                                                                                |
|                                              | Ischemic                                                                                            | 433.01, 433.11, 433.21, 433.31, 433.81, 433.91, 434.01, 434.11, 434.91                                        | I63, I63.x, I63.xx                                                                                                                                                             |
|                                              | Hemorrhagic                                                                                         | 430, 431                                                                                                      | I60, I60.x, I60.xx, I61, I61.x                                                                                                                                                 |
|                                              | TIA                                                                                                 | 435, 435.x                                                                                                    | G45, G45.x                                                                                                                                                                     |
| Hepatic                                      | Gallstones, cholelithiasis <sup>a</sup>                                                             | 574, 574.x, 674.xx                                                                                            | K80.x, K80.xx                                                                                                                                                                  |
|                                              | Cholecystitis <sup>a</sup>                                                                          | 575.0, 575.1, 575.10, 575.11, 575.12                                                                          | K81.x                                                                                                                                                                          |
|                                              | Bilirubinemia <sup>a</sup>                                                                          | 277.4                                                                                                         | R82.2                                                                                                                                                                          |
|                                              | Biliary sludge <sup>a</sup>                                                                         | 576.8 (other specified disorders of biliary tract)                                                            | K83.8 (other specified diseases of biliary tract)                                                                                                                              |
|                                              | Acute hepatic sequestration <sup>a</sup>                                                            | 573.8 (other specified disorders of liver)                                                                    | K76.89 (other specified diseases of liver)                                                                                                                                     |
|                                              | Acute intrahepatic cholestasis <sup>a</sup>                                                         | 576.2 (obstruction of bile duct)                                                                              | K83.1 (obstruction of bile duct)                                                                                                                                               |
|                                              | Other gall bladder disease <sup>b,c</sup>                                                           | 575, 575.x, 575.xx                                                                                            | K82, K82.x, K82.xx                                                                                                                                                             |
| Renal                                        | Hematuria                                                                                           | 599.7, 599.7x                                                                                                 | R31, R31.x, R31.xx                                                                                                                                                             |
|                                              | Proteinuria including microalbuminuria                                                              | 791.0                                                                                                         | R80, R80.x                                                                                                                                                                     |
|                                              | Polyuria                                                                                            | 788.42                                                                                                        | R35, R35.x                                                                                                                                                                     |
|                                              | Nephrolithiasis                                                                                     | 592                                                                                                           | N20.0                                                                                                                                                                          |
|                                              | Papillary necrosis                                                                                  | 583.7 (nephritis and nephropathy, not specified as acute or chronic, with lesion of renal medullary necrosis) | N17.2                                                                                                                                                                          |
|                                              | CKD                                                                                                 | 593.9 (unspecified disorder of kidney and ureter)                                                             | N18.9 (CKD, stages I–V, to be more specific)                                                                                                                                   |
|                                              | Glomerulonephritis (acute, chronic)                                                                 | 580, 580.x, 580.xx, 582, 582.x, 582.xx                                                                        | N00.2-5, N00.7, N01.2-5, N01.7, N02.2-5, N02.7, N03.2-5, N03.7, N04.2-5, N04.7, N05.2-5, N05.7, N06.2-5, N06.7, N07.2-5, N07.7                                                 |
| Renal failure, acute or chronic <sup>c</sup> | 584, 584.x, 585, 585.x 586                                                                          | N17, N17.x, N18, N18.x, N19                                                                                   |                                                                                                                                                                                |
| Hematology                                   | Thrombosis <sup>a</sup>                                                                             | 452, 453, 453.x, 453.xx                                                                                       | I81, I82.x, I82.xx, I82.xxx                                                                                                                                                    |
|                                              | Aplastic anemia <sup>a</sup>                                                                        | 284.89                                                                                                        | D61.89                                                                                                                                                                         |
|                                              | Myelosuppression                                                                                    | 289.9 (unspecified diseases of blood and blood-forming organs)                                                | D75.9 (disease of blood and blood-forming organs, unspecified)                                                                                                                 |
|                                              | Hemolytic anemia <sup>b</sup> /hyperhemolysis <sup>a</sup> (delayed hemolytic transfusion reaction) | 283.1, 283.10, 283.19, 283.9                                                                                  | D59.4, D59.8, D59.9                                                                                                                                                            |
|                                              | Splenic sequestration <sup>a</sup>                                                                  | 289.52                                                                                                        | D57.02 (Hb-SS disease with splenic sequestration), D57.212 (sickle-cell/Hb-C disease with splenic sequestration), D57.412 (sickle-cell thalassemia with splenic sequestration) |
| Spleen                                       | Splenic infarcts                                                                                    | 289.59 (other diseases of spleen)                                                                             | D73.5                                                                                                                                                                          |
|                                              | Hypersplenism                                                                                       | 289.4                                                                                                         | D73.1                                                                                                                                                                          |
|                                              | Priapism <sup>a,b,c</sup>                                                                           | 607.3                                                                                                         | N48.3, N48.30, N48.32, N48.39                                                                                                                                                  |

Table S1. ICD-9-CM and ICD-10 Codes for Complications of SCD (Continued)

| Anatomy                                 | Disease/Disorder                                                                                     | ICD-9-CM                                               | ICD-10                                                                                                      |
|-----------------------------------------|------------------------------------------------------------------------------------------------------|--------------------------------------------------------|-------------------------------------------------------------------------------------------------------------|
| Pulmonary                               | Pneumococcal pneumonia                                                                               | 481                                                    | J13                                                                                                         |
|                                         | Pulmonary embolism <sup>a</sup>                                                                      | 415.1, 415.19, 416.2                                   | I26.09, I26.99, I27.82                                                                                      |
|                                         | Pulmonary hypertension <sup>b</sup>                                                                  | 416.8                                                  | I27.2, I27.21, I29.29, I27.8, I27.89, I27.9                                                                 |
|                                         | ACS <sup>a</sup>                                                                                     | 517.3                                                  | D57.01, D57.211, D57.411, D57.811                                                                           |
|                                         | Asthma                                                                                               | 493.1, 493.1x, 493.2, 493.2x, 493.9, 493.9x            | J45.2, J45.2x, J45.3, J45.3x, J45.4, J45.4x, J45.5, J45.5x, J45.90, J45.90x                                 |
|                                         | Upper respiratory tract infections                                                                   | 465, 465.x                                             | J00, J01, J01.x, J01.xx, J02, J02.x, J03, J03.x, J03.xx, J04, J04.x, J04.xx, J05, J05.x, J05.xx, J06, J06.x |
| Neurology                               | Acute sickle cell pain episode / VOC crisis <sup>a</sup>                                             | 282.62, 282.64, 282.69, 282.42                         | D57.0, D57.00, D57.21, D57.219, D57.81, D57.819, D57.41, D57.419                                            |
|                                         | Chronic pain syndrome <sup>b</sup> (neuropathic pain)                                                | 729.2                                                  | M54.1, M54.1x, M79.2                                                                                        |
|                                         | Seizures                                                                                             | 345, 345.x, 345.xx, 780.3                              | G40, G40.x, G40.xx, R56.9                                                                                   |
|                                         | Moyamoya                                                                                             | 437.5                                                  | I67.5                                                                                                       |
|                                         | Obstructive sleep apnea                                                                              | 327.23                                                 | G47.33                                                                                                      |
| Ocular                                  | Orbital cellulitis                                                                                   | 376.01                                                 | H05.01, H05.01x                                                                                             |
|                                         | Retinopathy <sup>b,c</sup>                                                                           | 362.72                                                 | H36 (retinal disorders in diseases classified elsewhere)                                                    |
|                                         | Retinal vascular occlusion (orbital infarction)                                                      | 362.3, 362.3x                                          | H34 (retinal vascular occlusions), H34.x, H34.xx, H43.xxx                                                   |
|                                         | Retinal detachment                                                                                   | 361.2                                                  | H33.2                                                                                                       |
|                                         | Hyphema                                                                                              | 364.41                                                 | H21.0, H21.0x                                                                                               |
| Musculoskeletal                         | Avascular necrosis (bone infarction; osteonecrosis) <sup>a,b,c</sup>                                 | 733.4x                                                 | M87.3, M87.3x, M87.3xx, M87.8, M87.8x, M87.8xx, M87.9                                                       |
|                                         | Osteomyelitis                                                                                        | 730, 730.x, 730.xx                                     | M86, M86.x, M86.xx, M86.xxx                                                                                 |
| Dermatology                             | Hand foot syndrome (dacrylitis)                                                                      | 729.5                                                  | M79.644, M79.645, M79.646 (pain in fingers)                                                                 |
|                                         | Leg ulcers <sup>b,c</sup>                                                                            | 454.0, 454.2, 707.1, 707.1x                            | I83.0, I83.0x, I83.0xx, I83.2, I83.2x, I83.2xx, L97, L97.x, L97.xx, L97.xxx                                 |
|                                         | Cellulitis                                                                                           | 681, 681.x, 681.xx, 682, 682.x                         | L03.x, L03.xx, L03.xxx                                                                                      |
| Gastrointestinal                        | Constipation                                                                                         | 564.0, 564.0x                                          | K59.0, K59.0x                                                                                               |
| Other infectious and parasitic diseases | Meningitis <sup>a</sup>                                                                              | 047, 047.x, 320, 320.x, 320.xx, 321, 321.x, 322, 322.x | A87, A87.x, G00, G00.x, G01, G02, G03, G03.x                                                                |
|                                         | Sepsis/Septicemia <sup>a</sup>                                                                       | 995.91, 995.92, 038, 038.x, 038.xx                     | A41, A41.x, A41.xx, R65.2, R65.2x                                                                           |
| Others                                  | Hypovolemia                                                                                          | 276.52                                                 | E86.1                                                                                                       |
|                                         | Iron overload <sup>b</sup>                                                                           | 275.02                                                 | E83.111                                                                                                     |
|                                         | Infectious and noninfectious systemic inflammation with acute organ dysfunction (multiorgan failure) | 995.92, 995.94                                         | R65.11, R65.20, R65.21                                                                                      |
|                                         | Neoplasms benign and malignant cancer                                                                | 140–239                                                | C00–D49                                                                                                     |

Abbreviations: ACS, acute chest syndrome; CHF, congestive heart failure; CKD, chronic kidney disease; Hb, hemoglobin; ICD-CM, International Classification of Diseases Clinical Modification; SCD, sickle cell disease; TIA, transient ischemic attack; VOC, vaso-occlusive crisis.

<sup>a</sup> Acute.

<sup>b</sup> Chronic.

<sup>c</sup> Organ damage.

**Table S2. ICD-9-CM and ICD-10 Codes for Comorbidities Associated with SCD**

| <b>Description</b>     | <b>ICD-9-CM</b>                    | <b>ICD-10</b>                             |
|------------------------|------------------------------------|-------------------------------------------|
| Cardiovascular disease |                                    |                                           |
| CHF                    | 428.0                              | I50.2, I50.3, I50.4, I50.9                |
| CAD                    | 414.00                             | I25.10                                    |
| Valvular heart disease | 394.x, 395.x, 396.x                | I34.x, I35.x, I36.x, I37.x, I38.x, I39.x  |
| Diabetes Mellitus      | 250.x                              | E11.x                                     |
| Hyperlipidemia         | 272.0x, 272.1x,<br>272.2x, 272.4x, | E78.0x, E78.1x, E78.2x, E78.4x,<br>E78.5x |
| Hypertension           | 401.x                              | I10                                       |
| Osteoporosis           | 733.0x                             | M80.x, M81.x                              |
| Gout                   | 274.x                              | M10.x                                     |
| Obesity                | 278, 278.0x                        | E66.x                                     |

Abbreviations: CAD, coronary artery disease; CHF, congestive heart failure; SCD, sickle cell disease.

**Table S3. Negative Binomial Regression Examining the Relationship Between Opioid Use and All-Cause and SCD-Related Hospitalizations (N = 3368)**

| Outcome: All-Cause Hospitalization                       | Incidence Rate Ratio | 95% Confidence Limits |              | Wald X <sup>2</sup> | P-value           |
|----------------------------------------------------------|----------------------|-----------------------|--------------|---------------------|-------------------|
|                                                          |                      | Lower                 | Upper        |                     |                   |
| <b>Number of Opioids (claims)</b>                        | <b>1.023</b>         | <b>1.017</b>          | <b>1.029</b> | <b>60.66</b>        | <b>&lt;0.0001</b> |
| 13–17 <sup>a</sup>                                       | 1.237                | 1.050                 | 1.457        | 6.44                | 0.0111            |
| 18–24 <sup>a</sup>                                       | 2.497                | 2.173                 | 2.869        | 166.46              | <0.0001           |
| 25–34 <sup>a</sup>                                       | 2.366                | 2.055                 | 2.725        | 142.82              | <0.0001           |
| 35–44 <sup>a</sup>                                       | 1.600                | 1.348                 | 1.900        | 28.81               | <0.0001           |
| 45 and older <sup>a</sup>                                | 1.213                | 1.002                 | 1.469        | 3.94                | 0.0471            |
| Male <sup>a</sup>                                        | 0.985                | 0.903                 | 1.075        | 0.12                | 0.7313            |
| Number of non-opioid pain medications                    | 1.005                | 0.984                 | 1.026        | 0.20                | 0.6532            |
| Number of non-study SCD-related medications <sup>b</sup> | 1.009                | 0.999                 | 1.018        | 3.19                | 0.0742            |
| Evidence of transfusion <sup>a</sup>                     | 1.052                | 0.890                 | 1.242        | 0.35                | 0.5543            |
| Number of SCD-related complications                      | 1.294                | 1.269                 | 1.320        | 652.10              | <0.0001           |
| Number of SCD-related comorbidities                      | 0.997                | 0.949                 | 1.047        | 0.02                | 0.8928            |
| CCI $\geq$ 1 <sup>a</sup>                                | 1.128                | 1.022                 | 1.246        | 5.68                | 0.0172            |
| Outcome: SCD-Related Hospitalization                     | Incidence Rate Ratio | 95% Confidence Limits |              | Wald X <sup>2</sup> | P-value           |
| <b>Number of Opioids (claims)</b>                        | <b>1.029</b>         | <b>1.023</b>          | <b>1.036</b> | <b>78.09</b>        | <b>&lt;0.0001</b> |
| 13–17 <sup>a</sup>                                       | 1.232                | 1.032                 | 1.472        | 5.30                | 0.0213            |
| 18–24 <sup>a</sup>                                       | 2.501                | 2.148                 | 2.913        | 139.28              | <0.0001           |
| 25–34 <sup>a</sup>                                       | 2.357                | 2.017                 | 2.754        | 116.56              | <0.0001           |
| 35–44 <sup>a</sup>                                       | 1.516                | 1.253                 | 1.835        | 18.30               | <0.0001           |
| 45 and older <sup>a</sup>                                | 1.123                | 0.907                 | 1.391        | 1.13                | 0.2875            |
| Male <sup>a</sup>                                        | 1.042                | 0.946                 | 1.146        | 0.69                | 0.4051            |
| Number of non-opioid pain medications                    | 0.998                | 0.975                 | 1.022        | 0.03                | 0.8596            |
| Number of non-study SCD-related medications <sup>b</sup> | 1.013                | 1.003                 | 1.023        | 6.24                | 0.0125            |
| Evidence of transfusion <sup>a</sup>                     | 1.091                | 0.907                 | 1.312        | 0.86                | 0.3547            |
| Number of SCD-related complications                      | 1.333                | 1.303                 | 1.364        | 621.40              | <0.0001           |
| Number of SCD-related comorbidities                      | 0.903                | 0.854                 | 0.956        | 12.38               | 0.0004            |
| CCI $\geq$ 1 <sup>a</sup>                                | 1.087                | 0.975                 | 1.212        | 2.25                | 0.1333            |

Abbreviations: CCI, Charlson Comorbidity Index; SCD, sickle cell disease.

<sup>a</sup>Reference categories: age 2-12; Female; No evidence of transfusion; CCI=0.<sup>b</sup>Penicillin and folic acid.

**Table S4. Negative Binomial Regression Examining the Relationship Between Opioid Use and All-Cause and SCD-Related ED Visits (N = 3368)**

| Outcome: All-Cause ED Visits                             | Incidence Rate Ratio | 95% Confidence Limits |              | Wald X <sup>2</sup> | P-value           |
|----------------------------------------------------------|----------------------|-----------------------|--------------|---------------------|-------------------|
|                                                          |                      | Lower                 | Upper        |                     |                   |
| <b>Number of Opioids (claims)</b>                        | <b>1.037</b>         | <b>1.031</b>          | <b>1.043</b> | <b>156.90</b>       | <b>&lt;0.0001</b> |
| 13–17 <sup>a</sup>                                       | 0.971                | 0.844                 | 1.118        | 0.16                | 0.6852            |
| 18–24 <sup>a</sup>                                       | 2.281                | 2.016                 | 2.581        | 171.37              | <0.0001           |
| 25–34 <sup>a</sup>                                       | 2.696                | 2.382                 | 3.052        | 246.27              | <0.0001           |
| 35–44 <sup>a</sup>                                       | 1.833                | 1.578                 | 2.131        | 62.54               | <0.0001           |
| 45 and older <sup>a</sup>                                | 1.224                | 1.039                 | 1.442        | 5.86                | 0.0155            |
| Male <sup>a</sup>                                        | 0.971                | 0.899                 | 1.049        | 0.55                | 0.4586            |
| Number of non-opioid pain medications                    | 1.003                | 0.985                 | 1.022        | 0.13                | 0.7189            |
| Number of non-study SCD-related medications <sup>b</sup> | 0.995                | 0.987                 | 1.003        | 1.37                | 0.2411            |
| Evidence of transfusion <sup>a</sup>                     | 0.777                | 0.664                 | 0.909        | 9.94                | 0.0016            |
| Number of SCD-related complications                      | 1.246                | 1.223                 | 1.269        | 542.08              | <0.0001           |
| Number of SCD-related comorbidities                      | 1.057                | 1.009                 | 1.108        | 5.39                | 0.0203            |
| CCI $\geq$ 1 <sup>a</sup>                                | 1.134                | 1.039                 | 1.237        | 8.00                | 0.0047            |
| Outcome: SCD-Related ED Visits                           | Incidence Rate Ratio | 95% Confidence Limits |              | Wald X <sup>2</sup> | P-value           |
|                                                          |                      | Lower                 | Upper        |                     |                   |
| <b>Number of Opioids (claims)</b>                        | <b>1.045</b>         | <b>1.038</b>          | <b>1.053</b> | <b>153.70</b>       | <b>&lt;0.0001</b> |
| 13–17 <sup>a</sup>                                       | 1.009                | 0.851                 | 1.196        | 0.01                | 0.9164            |
| 18–24 <sup>a</sup>                                       | 2.329                | 2.005                 | 2.706        | 121.99              | <0.0001           |
| 25–34 <sup>a</sup>                                       | 2.662                | 2.288                 | 3.097        | 160.61              | <0.0001           |
| 35–44 <sup>a</sup>                                       | 1.820                | 1.517                 | 2.185        | 41.42               | <0.0001           |
| 45 and older <sup>a</sup>                                | 1.011                | 0.826                 | 1.239        | 0.01                | 0.9132            |
| Male <sup>a</sup>                                        | 1.097                | 0.999                 | 1.204        | 3.78                | 0.0518            |
| Number of non-opioid pain medications                    | 0.983                | 0.961                 | 1.006        | 2.07                | 0.1504            |
| Number of non-study SCD-related medications <sup>b</sup> | 0.998                | 0.988                 | 1.007        | 0.25                | 0.6149            |
| Evidence of transfusion <sup>a</sup>                     | 0.835                | 0.690                 | 1.010        | 3.47                | 0.0627            |
| Number of SCD-related complications                      | 1.321                | 1.291                 | 1.352        | 557.15              | <0.0001           |
| Number of SCD-related comorbidities                      | 0.914                | 0.862                 | 0.969        | 9.08                | 0.0026            |
| CCI $\geq$ 1 <sup>a</sup>                                | 1.035                | 0.931                 | 1.151        | 0.41                | 0.5234            |

Abbreviations: CCI, Charlson Comorbidity Index; ED, emergency department; SCD, sickle cell disease.

<sup>a</sup>Reference categories: age 2–12; Female; No evidence of transfusion; CCI=0.<sup>b</sup>Penicillin and folic acid.

**Table S5. Negative Binomial Regression Examining the Relationship Between Opioid Use and All-Cause and SCD-Related Outpatient Visits (N = 3368)**

| Outcome: All-Cause Outpatient Visits                     | Incidence Rate Ratio | 95% Confidence Limits |              | Wald X <sup>2</sup> | P-value           |
|----------------------------------------------------------|----------------------|-----------------------|--------------|---------------------|-------------------|
|                                                          |                      | Lower                 | Upper        |                     |                   |
| <b>Number of Opioids (claims)</b>                        | <b>1.006</b>         | <b>1.002</b>          | <b>1.009</b> | <b>8.45</b>         | <b>0.0037</b>     |
| 13–17 <sup>a</sup>                                       | 0.917                | 0.838                 | 1.003        | 3.60                | 0.0579            |
| 18–24 <sup>a</sup>                                       | 1.010                | 0.928                 | 1.099        | 0.05                | 0.8190            |
| 25–34 <sup>a</sup>                                       | 1.154                | 1.058                 | 1.258        | 10.40               | 0.0013            |
| 35–44 <sup>a</sup>                                       | 1.177                | 1.060                 | 1.307        | 9.31                | 0.0023            |
| 45 and older <sup>a</sup>                                | 1.147                | 1.024                 | 1.284        | 5.61                | 0.0178            |
| Male <sup>a</sup>                                        | 0.941                | 0.892                 | 0.993        | 4.87                | 0.0273            |
| Number of non-opioid pain medications                    | 1.008                | 0.995                 | 1.021        | 1.61                | 0.2051            |
| Number of non-study SCD-related medications <sup>b</sup> | 1.020                | 1.015                 | 1.026        | 54.99               | <0.0001           |
| Evidence of transfusion <sup>a</sup>                     | 1.575                | 1.414                 | 1.756        | 67.59               | <0.0001           |
| Number of SCD-related complications                      | 1.093                | 1.079                 | 1.107        | 184.98              | <0.0001           |
| Number of SCD-related comorbidities                      | 1.204                | 1.164                 | 1.245        | 116.49              | <0.0001           |
| CCI $\geq$ 1 <sup>a</sup>                                | 1.400                | 1.317                 | 1.488        | 115.63              | <0.0001           |
| Outcome: SCD-Related Outpatient Visits                   | Incidence Rate Ratio | 95% Confidence Limits |              | Wald X <sup>2</sup> | P-value           |
|                                                          |                      | Lower                 | Upper        |                     |                   |
| <b>Number of Opioids (claims)</b>                        | <b>1.011</b>         | <b>1.006</b>          | <b>1.015</b> | <b>21.88</b>        | <b>&lt;0.0001</b> |
| 13–17 <sup>a</sup>                                       | 0.928                | 0.837                 | 1.030        | 1.97                | 0.1600            |
| 18–24 <sup>a</sup>                                       | 1.031                | 0.935                 | 1.138        | 0.38                | 0.5367            |
| 25–34 <sup>a</sup>                                       | 1.261                | 1.141                 | 1.393        | 20.76               | <0.0001           |
| 35–44 <sup>a</sup>                                       | 1.176                | 1.045                 | 1.324        | 7.25                | 0.0071            |
| 45 and older <sup>a</sup>                                | 1.013                | 0.891                 | 1.151        | 0.04                | 0.8489            |
| Male <sup>a</sup>                                        | 0.954                | 0.898                 | 1.014        | 2.26                | 0.1331            |
| Number of non-opioid pain medications                    | 0.998                | 0.983                 | 1.012        | 0.09                | 0.7648            |
| Number of non-study SCD-related medications <sup>b</sup> | 1.030                | 1.024                 | 1.037        | 91.28               | <0.0001           |
| Evidence of transfusion <sup>a</sup>                     | 1.832                | 1.621                 | 2.070        | 94.10               | <0.0001           |
| Number of SCD-related complications                      | 1.148                | 1.131                 | 1.166        | 333.61              | <0.0001           |
| Number of SCD-related comorbidities                      | 0.983                | 0.945                 | 1.022        | 0.72                | 0.3963            |
| CCI $\geq$ 1 <sup>a</sup>                                | 1.293                | 1.205                 | 1.387        | 51.25               | <0.0001           |

Abbreviations: CCI, Charlson Comorbidity Index; SCD, sickle cell disease.

<sup>a</sup>Reference categories: age 2–12; Female; No evidence of transfusion; CCI=0.<sup>b</sup>Penicillin and folic acid.

**Table S6. Negative Binomial Regression Examining the Relationship Between Opioid Use and All-Cause and SCD-Related Prescriptions (n = 3368)**

| Outcome: All-Cause Prescriptions                         | Incidence Rate Ratio | 95% Confidence Limits |              | Wald X <sup>2</sup> | P-value           |
|----------------------------------------------------------|----------------------|-----------------------|--------------|---------------------|-------------------|
|                                                          |                      | Lower                 | Upper        |                     |                   |
| <b>Number of Opioids (claims)</b>                        | <b>1.067</b>         | <b>1.062</b>          | <b>1.073</b> | <b>541.89</b>       | <b>&lt;0.0001</b> |
| 13–17 <sup>a</sup>                                       | 0.954                | 0.860                 | 1.057        | 0.82                | 0.3657            |
| 18–24 <sup>a</sup>                                       | 0.751                | 0.680                 | 0.829        | 32.10               | <0.0001           |
| 25–34 <sup>a</sup>                                       | 0.712                | 0.643                 | 0.788        | 42.89               | <0.0001           |
| 35–44 <sup>a</sup>                                       | 0.721                | 0.637                 | 0.816        | 26.84               | <0.0001           |
| 45 and older <sup>a</sup>                                | 0.897                | 0.785                 | 1.024        | 2.61                | 0.1063            |
| Male <sup>a</sup>                                        | 0.900                | 0.845                 | 0.958        | 10.96               | 0.0009            |
| Number of non-opioid pain medications                    | 1.103                | 1.086                 | 1.121        | 146.89              | <0.0001           |
| Number of non-study SCD-related medications <sup>b</sup> | 1.080                | 1.073                 | 1.087        | 550.31              | <0.0001           |
| Evidence of transfusion <sup>a</sup>                     | 0.987                | 0.868                 | 1.122        | 0.04                | 0.8376            |
| Number of SCD-related complications                      | 1.011                | 0.996                 | 1.026        | 2.15                | 0.1428            |
| Number of SCD-related comorbidities                      | 1.231                | 1.184                 | 1.280        | 109.87              | <0.0001           |
| CCI $\geq$ 1 <sup>a</sup>                                | 1.539                | 1.435                 | 1.651        | 145.02              | <0.0001           |
| Outcome: SCD-Related Prescriptions <sup>c</sup>          | Incidence Rate Ratio | 95% Confidence Limits |              | Wald X <sup>2</sup> | P-value           |
| <b>Number of Opioids (claims)</b>                        | <b>1.040</b>         | <b>1.034</b>          | <b>1.046</b> | <b>176.65</b>       | <b>&lt;0.0001</b> |
| 13–18 <sup>a</sup>                                       | 0.960                | 0.857                 | 1.075        | 0.50                | 0.4774            |
| 18–24 <sup>a</sup>                                       | 0.759                | 0.679                 | 0.848        | 23.63               | <0.0001           |
| 25–34 <sup>a</sup>                                       | 0.681                | 0.606                 | 0.764        | 42.37               | <0.0001           |
| 35–44 <sup>a</sup>                                       | 0.599                | 0.517                 | 0.695        | 46.21               | <0.0001           |
| 45 and older <sup>a</sup>                                | 0.558                | 0.475                 | 0.656        | 49.97               | <0.0001           |
| Male <sup>a</sup>                                        | 1.039                | 0.969                 | 1.114        | 1.13                | 0.2870            |
| Number of non-opioid pain medications                    | 1.035                | 1.018                 | 1.053        | 16.43               | <0.0001           |
| Number of non-study SCD-related medications <sup>b</sup> | 1.205                | 1.195                 | 1.214        | 2029.60             | <0.0001           |
| Evidence of transfusion <sup>a</sup>                     | 1.071                | 0.926                 | 1.238        | 0.85                | 0.3567            |
| Number of SCD-related complications                      | 1.037                | 1.020                 | 1.055        | 18.17               | <0.0001           |
| Number of SCD-related comorbidities                      | 0.909                | 0.868                 | 0.952        | 16.34               | <0.0001           |
| CCI $\geq$ 1 <sup>a</sup>                                | 1.004                | 0.927                 | 1.088        | 0.01                | 0.9150            |

Abbreviations: CCI, Charlson Comorbidity Index; SCD, sickle cell disease.

<sup>a</sup>Reference categories: age 2–12; female; no evidence of transfusion; CCI=0.<sup>b</sup>Penicillin and folic acid.<sup>c</sup>Hydroxyurea, penicillin, and folic acid
